# Supplementary material for: Carrier-free, self-assembled pure drug nanorods composed of 10-hydroxycamptothecin and chlorin e6 for combinatorial chemo-photodynamic antitumor therapy in vivo
Source: Royal Society of Chemistry journal article supplement (doi:10.1039/c7nr03129g), 2017-01-01
Supplement: c7nr03129g1.pdf [file c7nr03129g1.pdf]

## Electronic Supplementary Information

# Carrier-free, Self-assembled Pure Drug Nanorods Composed of 10-Hydroxycamptothecin and Chlorin e6 for Combinatorial Chemo-Photodynamic Antitumor Therapy *in vivo*

## Table of Contents

**Figure S1.** TEM image of (A) pure HCPT nanostructure prepared through reprecipitation method and (B) self-assembled nanoparticles of deprotonated Ce6 in aqueous solution.

**Figure S2.** Representative hydrodynamic diameters of HCPT/Ce6 nanostructures with different ratios determined by DLS.

**Figure S3.** Zeta potential of HCPT/Ce6 NRs.

**Figure S4.** Fluorescence emission spectra of SOSG solution in the presence of HCPT/Ce6 NRs with the increase of laser irradiation time.

**Figure S5.** Cell viability curves and the  $IC_{50}$  values ( $\mu M$ ) of (A) 4T1, (B) A549 and (C) MCF-7 cells.

**Figure S6.** Viability of (A) A549 cells (B) MCF-7 cells.

**Figure S7.** Representative digital photos of (A) full-scale view of mice in each group, (B) enlarged local view of tumor sites from (A), (C) excised 4T1 tumor tissues after various treatments for 12 days.

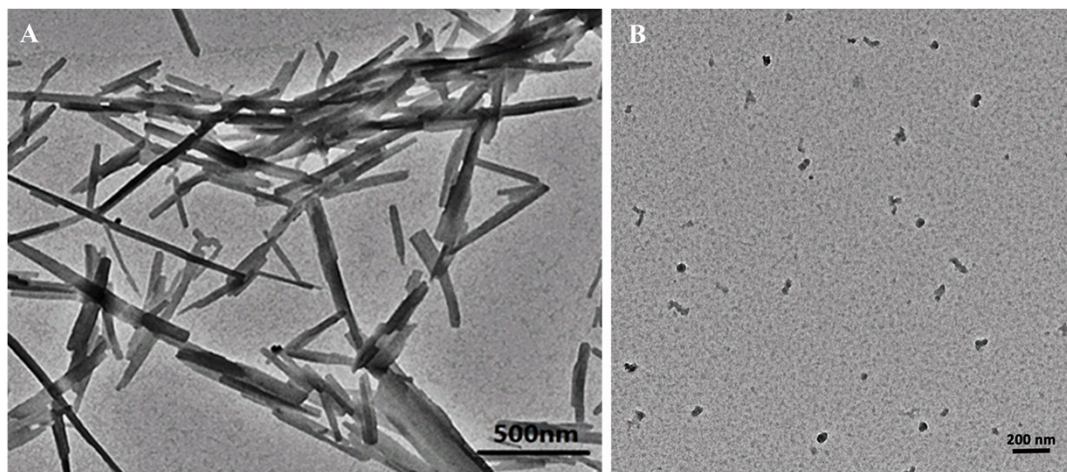

**Figure S1.** TEM image of (A) pure HCPT nanostructure prepared through reprecipitation method and (B) self-assembled nanoparticles of deprotonated Ce6 in aqueous solution.

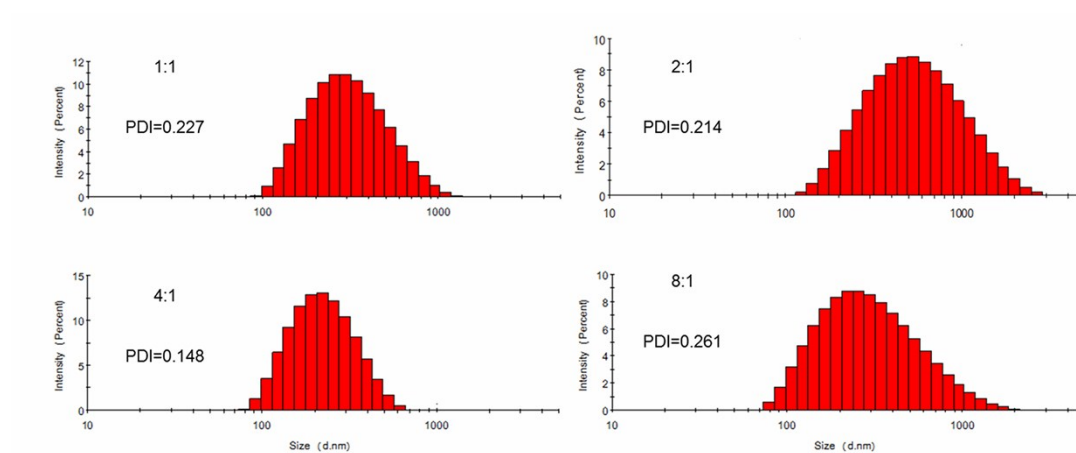

**Figure S2.** Representative hydrodynamic diameters of HCPT/Ce6 nanostructures with different ratios determined by DLS.

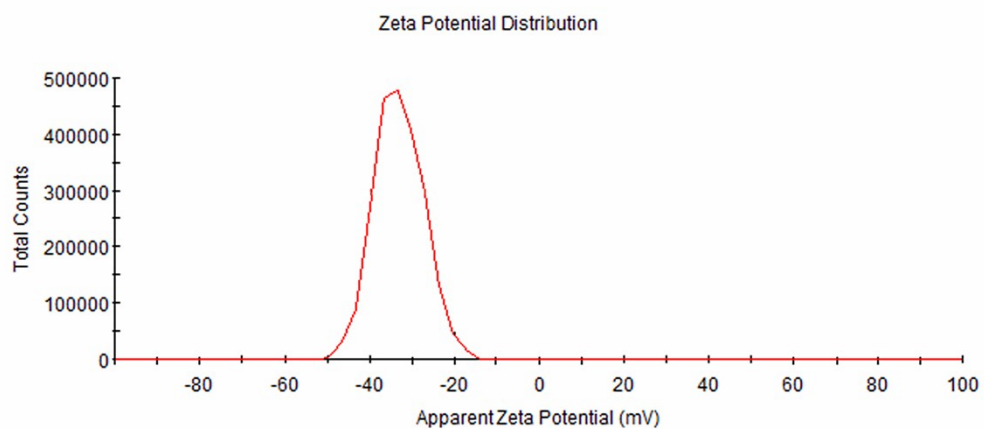

**Figure S3.** Zeta potential of HCPT/Ce6 NRs.

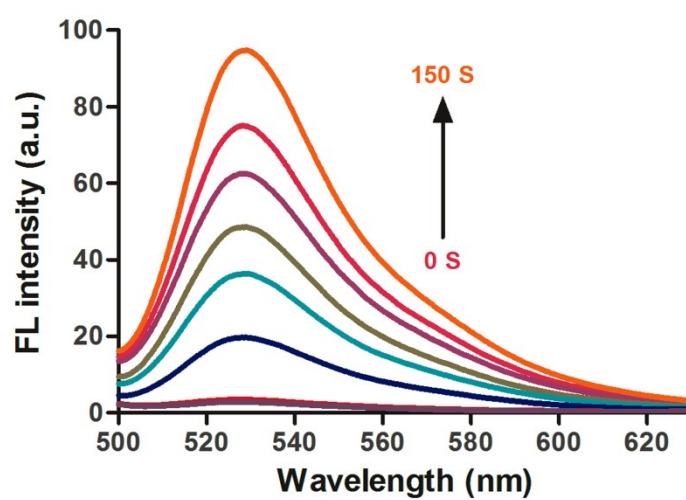

**Figure S4.** Fluorescence emission spectra of SOSG solution in the presence of HCPT/Ce6 NRs with the increase of laser irradiation time.

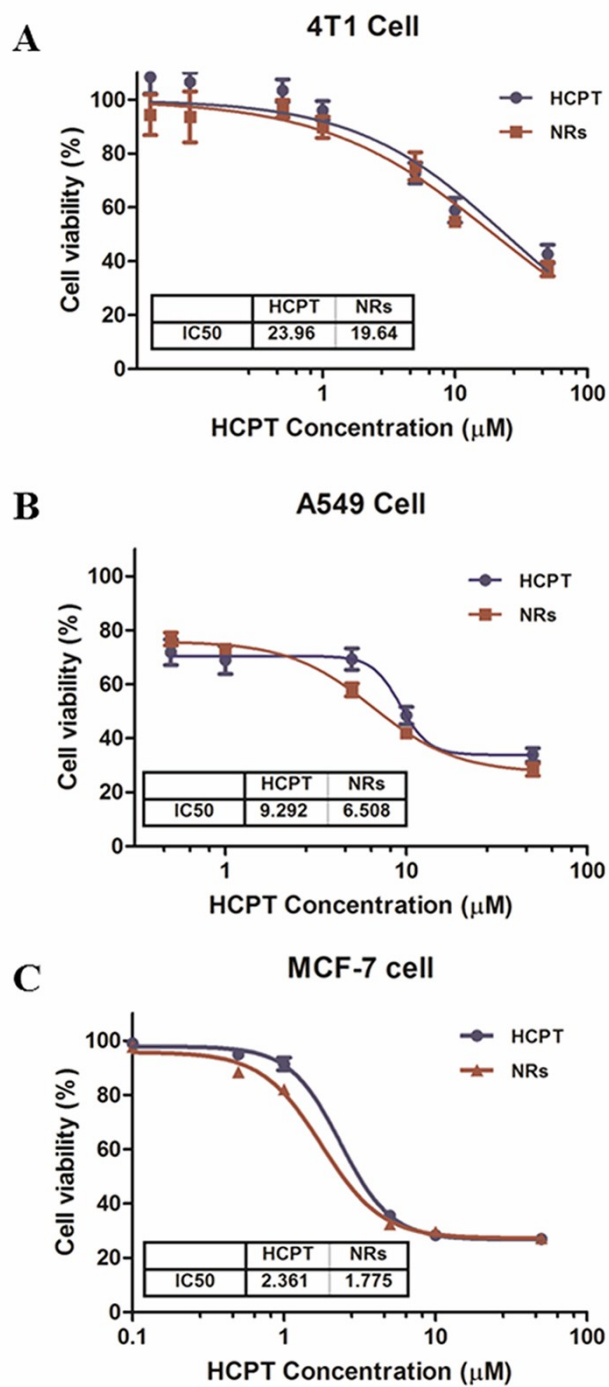

**Figure S5.** Cell viability curves and the IC<sub>50</sub> values (μM) of (A) 4T1, (B) A549 and (C) MCF-7 cells after incubation with free HCPT or HCPT/Ce6 NRs for 48 h.

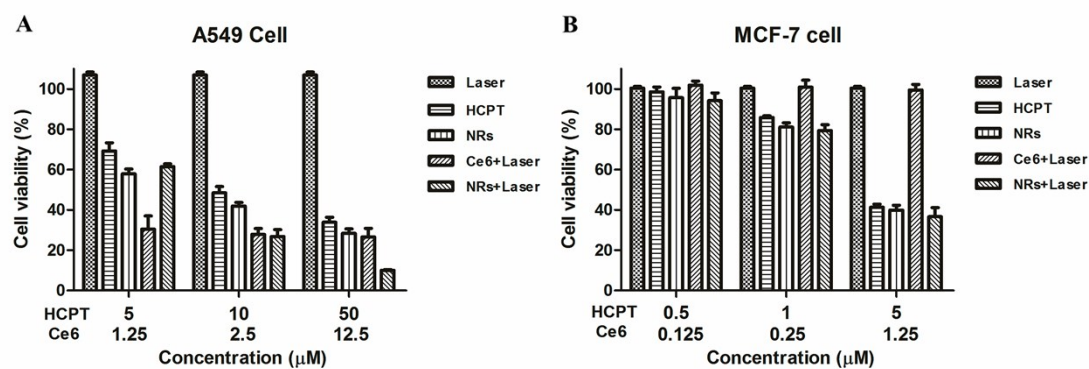

**Figure S6.** Viability of (A) A549 cells (B) MCF-7 cells after incubation with various formulations with (+Laser) or without laser irradiation ( $\lambda = 655 \text{ nm}$ ,  $150 \text{ mW/cm}^2$ ,  $2 \text{ min}$ ).

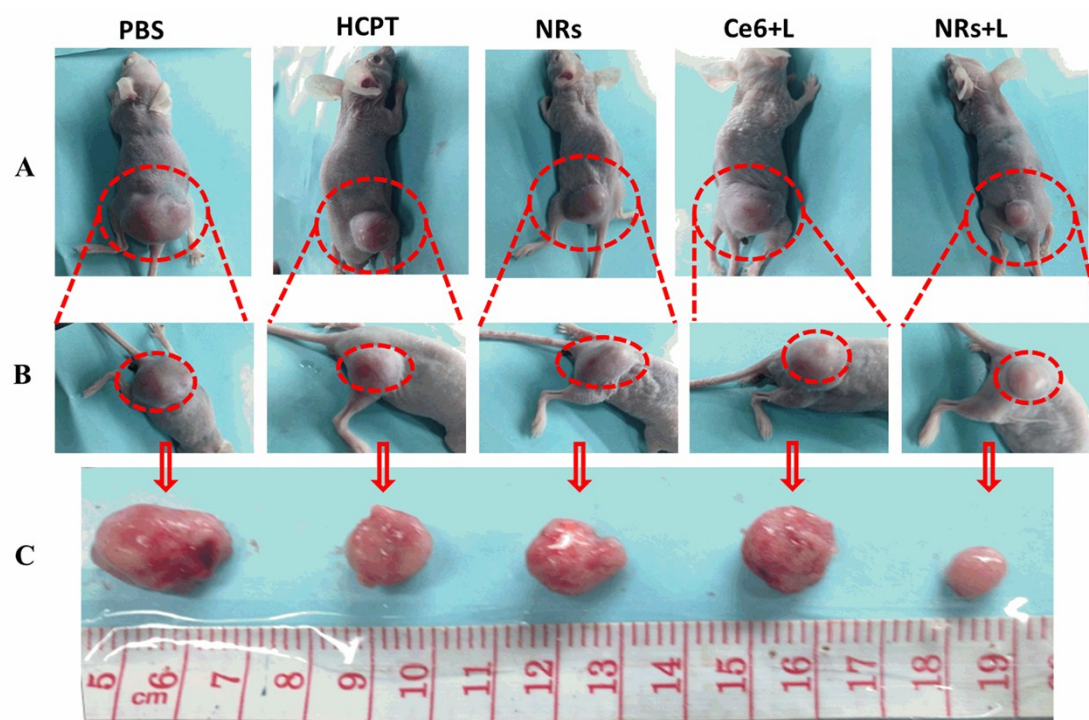

**Figure S7.** Representative digital photos of (A) full-scale view of mice in each group, (B) enlarged local view of tumor sites from (A), (C) excised 4T1 tumor tissues after various treatments for 12 days.
